1 **TITLE PAGE**

2

3 *Research Article*

4

5 **Variability in Fruit Yield and Quality of Genetically Diverse Tomato Cultivars in**

6 **Response to Different Biochars**

7

8 **Elvir Tenic<sup>1</sup>, Daylen Isaac<sup>1</sup>, Rishikesh Ghogare, and Amit Dhingra\***

9 Affiliation: Department of Horticulture, Washington State University, Pullman, WA

10 ET - elvir.tenic@wsu.edu, DI - daylen.isaac@wsu.edu, RG - rishikesh.ghogare@wsu.edu

11 <sup>1</sup>These authors contributed equally to this work.

12 \*Correspondence: adhingra@wsu.edu, Tel: 509-335-3625

13 Received: date; Accepted: date; Published: date

14

15

16

17

18

19

20

21

22

23

24

25 **Abstract**

26 *Background:* Intensive agricultural practices have reduced soil health thereby negatively  
27 impacting crop yields. There is a need to maintain healthy soils and restore marginal lands to  
28 ensure efficient food production. Biochar, a porous carbon-rich material generated from  
29 pyrolysis of various feedstock sources is receiving attention as a soil amendment that has the  
30 potential to restore soil organic carbon content and also enhance crop yields. However, the  
31 physical and chemical properties of biochar are influenced by pyrolysis parameters. These in  
32 turn determine its interaction with the soil, thereby influencing its biological properties in  
33 terms of impact on soil microcosm and plant productivity. While most studies report the  
34 evaluation of one biochar and a single plant cultivar, the role of the plant's genetic  
35 background in responding to biochar as a soil amendment remains unanswered. The impact  
36 of six distinct biochars on agronomic performance and fruit quality of three genetically  
37 diverse tomato (*Solanum lycopersicum*) cultivars was evaluated to test the hypotheses that 1)  
38 biochars derived from different feedstock sources would produce unique phenotypes in a  
39 single cultivar of tomato, and 2) single feedstock-derived BC would produce different  
40 phenotypes in each of the three tomato cultivars.

41 *Results:* Different biochars impacted shoot dry weight, total fruit weight, and yield per plant  
42 in each cultivar differently. Both positive and negative effects were observed depending on  
43 the biochar-cultivar combination. In 'Oregon Spring', Ryegrass straw and CoolTerra biochar  
44 enhanced yield. In 'Heinz', an increase in fruit weight and citric acid was observed with  
45 several of the biochars. In 'Cobra', improved yields were accompanied by reduction in fruit  
46 quality parameters. Both hypotheses were supported by the data.

47 *Conclusions:* This study demonstrated that the genetic background of a plant is an important  
48 variable in determining the outcome of using biochar as a soil amendment. Strategies for  
49 application of biochar in agricultural production should consider the variables of soil type,  
50 feedstock source, pyrolysis parameters and plant genetic background for enhancing crop  
51 productivity and carbon sequestration.

52

53 **Keywords:** 3-10 words

54 **Abbreviations:** BC - Biochar, SOM - soil organic matter, SOC - soil organic carbon, CT -  
55 Cool Terra®, RGS - Ryegrass straw, RGT - Ryegrass tailings, RT - Russian thistle, TMP -  
56 Thermomechanical pulp, and W – Walnut, SEM - Scanning Electron Microscopy, EX -  
57 energy-dispersive X-ray spectroscopy – EDX, w/w – weight/weight, High Pressure Sodium -  
58 HPS, total soluble solids - TSS, N - nitrogen, P - phosphorus, K - potassium, Ca - calcium, S  
59 - sulfur, Mg - magnesium, Mo - molybdenum, Si - silicon, Cl - chlorine, Na - sodium, Al –  
60 aluminum

61

62

63

64

65

66

67

68

69

70 **1. Background**

71 Agricultural soils have been strained to reach their highest potential in productivity and now  
72 encounter several biotic and abiotic challenges. Years of intensified crop production has  
73 adversely impacted soil health. Ever-increasing application of fertilizer and irrigation has  
74 resulted in the loss of organic matter and sodification, leading to deterioration of soil tilth [1].  
75 To combat these impending detriments to soil health, management approaches are being  
76 adopted to increase soil organic matter (SOM), foster a diverse soil microcosm, improve crop  
77 productivity, and promote additional ecosystems services [2–5]. However, due to changing  
78 climatic conditions, soil organic carbon (SOC) levels are projected to decrease in the future  
79 [6]. Therefore, it is critical to pursue interventions that encourage beneficial soil practices  
80 such as implementing cover crops and reduced tillage [7–9]. Such measures will aid in the  
81 development of carbon negative ecosystems, which focus on returning carbon assimilated by  
82 plants back into the soil in a stable form with a long half-life. The carbon positive cycle  
83 promoted by intense agriculture has further heightened the challenges posed by soil erosion  
84 and changing climate conditions [10,11]. These challenges need to be addressed to secure  
85 global food supplies for the current and future generations.

86

87 The practices of early indigenous cultures of the Amazon over 2500 years ago are known to  
88 have improved soil health through incorporation of burnt biomass, resulting in production of  
89 a high-fertility '*Terra Preta*' layer atop the otherwise sub-fertile Amazon soil [3,12–15]. In  
90 the 17<sup>th</sup> century, Japanese agriculturalists experimented with low-oxygen burnt rice husk as a  
91 soil amendment for more intense crop production [16]. Recently, there has been an

92 emerging emphasis on the use of burnt biomass, or biochar, to reclaim the health of marginal  
93 soils.

94

95 Biochar (BC) is a carbon-rich, porous product generated by a thermochemical process known  
96 as pyrolysis. It involves controlled burning of feedstock under low oxygen levels at

97 temperatures ranging from 300°C to 800°C [17,18]. Production of biochar can be achieved

98 using various feedstocks, the most common of which include agricultural crop residue,

99 organic manure, and wood [19]. With improvements in automation, and with growing

100 knowledge of the utility of BC as a soil amendment with the potential to enhance nutrient

101 availability and facilitate long-term carbon sequestration, it is now feasible to produce

102 consistent quality biochar that is expected to spur its utilization both in research and farming

103 [20–24].

104

105 Specific impacts of biochar amendment to soil include alterations in bulk density, porosity,

106 and water retention; these properties make the exchange of water, nutrients, and gases more

107 efficient, resulting in enhanced crop productivity [25,26]. Additionally, since BC is a stable

108 source of carbon and nutrients, it influences the soil microcosm by fostering the proliferation

109 of microbial communities for extended periods, which in turn enhance soil tilth and health

110 [27]. The biological, chemical, and physical influence of biochar and its role in enhancing

111 soil health is well-documented; however, its utilization in soils produces a spectrum of

112 outcomes in terms of crop productivity [28–34].

113

114 Productivity in a diverse range of crops, like tomato, lettuce and other leafy vegetables,  
115 beans, potato, wheat, maize, and rice to name a few, has been evaluated in soils amended with  
116 biochar derived from various feedstocks [30,35–40]. The feedstock source determines the  
117 final nutrient profile of the biochar. Organic waste feedstocks generate biochar rich in  
118 potassium and phosphorus, low in C levels, and low in surface area. Biochar derived from  
119 wood feedstocks is enriched in organic matter and surface area; however, it has low N, P, and  
120 K levels, and reduced capacity for cation exchange. Generally, crop residue-derived biochars  
121 are rich in N [41–43]. The variation in nutrient profiles along with other physical properties  
122 determines how the biochar interacts with the soil and collectively influences plant  
123 performance.

124

125 Several recent meta-analyses of the various studies investigating the role of biochar on crop  
126 productivity conclude that, overall, there is a positive impact on crop yield [22,43,44].  
127 However, there are studies where biochar amendment impacts one aspect of plant  
128 development but has no impact on yield or it produces a detrimental outcome [32,37,45]. It is  
129 well-known that the genetic background of a plant influences how it responds to a given  
130 stimulus [46–48]. Interestingly, most previous reports evaluating the impact of biochar have  
131 studied one cultivar's response to biochar derived from a single feedstock. The question then  
132 emerges of whether different cultivars will respond differently to biochars derived from  
133 different feedstocks.

134

135 In this study, the impact of biochars derived from six different feedstocks on the growth and  
136 development of three genotypically-distinct cultivars of tomato (*Solanum lycopersicum* L.)  
137 was evaluated. Experiments were conducted to test the following hypotheses: 1) Biochars  
138 derived from different feedstock sources will produce unique phenotypes in a single cultivar  
139 of tomato, and 2) a single feedstock-derived biochar will produce different phenotypes in  
140 each of the three tomato cultivars.

141

## 142 **2. Methods**

### 143 a. Biochar source

144

145 Five types of BC generated from their respective feedstocks were provided by Ag Energy  
146 Systems, (Spokane, WA). The feedstocks used were as follows: Ryegrass straw (RGS),  
147 Ryegrass tailings (RGT), Russian thistle (RT), thermomechanical pulp waste (TMP), and  
148 Walnut shell (W). A commercially available BC product, Cool Terra® (CT), manufactured  
149 by Cool Planet (Greenwood Village, CO), was also used in the study. All experiments were  
150 conducted with 0.5% and 1% w/w rates of BC amendment.

151

### 152 b. SEM and EDX Analysis

153

154 Scanning Electron Microscopy (SEM) was performed on each biochar at the Franceschi  
155 Microscopy and Imaging Center at Washington State University. A sample of each biochar  
156 was fixed to a pin stub and sputter coated in gold. SEM samples were imaged on a Tescan

157 Vega SEM equipped with an Energy-dispersive X-ray spectroscopy (EDX) detector in order  
158 to make a qualitative visual assessment of porosity and general particle size. Qualitative  
159 elemental composition data for each biochar was collected with the EDX detector.

160

161 c. Plant growth conditions

162

163 Three cultivars of tomato (*Solanum lycopersicum* L.) representing unique market  
164 applications and diverse genetic backgrounds were selected for this experiment. ‘Oregon  
165 Spring’, an heirloom determinate variety was selected due to its popularity in home  
166 gardening. ‘Heinz 2653’, also a determinate variety, is commonly used as a commercial  
167 processing tomato. ‘Cobra F1’, an indeterminate variety, was selected due to its commercial  
168 use as a greenhouse variety.

169

170 Seeds for the three cultivars were obtained from Territorial Seed Company (Cottage Grove,  
171 Oregon). Seeds were germinated in 4-inch rockwool squares and grown to 4-5 nodes (15-20  
172 cm) in height. Afterwards, plantlets were transplanted into 2.8 L pots with either organic  
173 Sunshine Mix#1/LC1 (Sun Gro Horticulture, Massachusetts) as a control or Sunshine Mix  
174 containing biochar (BC) at 0.5% or 1% (w/w) rate. One week after transplant, each pot was  
175 fertilized twice a week with 450 mL of dilute (20 mL/L water) organic Alaska 5-1-1 Fish  
176 Fertilizer (Lilly Miller Brands, CA). Plants were maintained in the glasshouse at the  
177 Washington State University Plant Growth Facilities with temperatures held at 24°C/18°C  
178 (day/night); relative humidity was maintained at 40-60%. High Pressure Sodium (HPS)



179 lights provided supplemental lighting, extending day length to 16 hours as needed. Young  
180 plants were watered every other day, while the larger, mature plants were watered daily.

181

182 d. Experimental Design

183

184 Six individual experiments were conducted, with two experiments each for Oregon Spring’,  
185 ‘Heinz 2653’ (‘Heinz’), ‘and ‘Cobra’ F1, as reported in Table 1A and B. Experiments with  
186 ‘Heinz’ and ‘Oregon Spring’ were conducted over a period of 102 days while with ‘Cobra’  
187 F1 over a period of 182 days. All six experiments were conducted independently with  
188 randomized design in the Washington State University Glasshouse. Each experiment  
189 consisted of 56 plants: eight plants contained 0% BC and served as controls, while four plants  
190 were randomly assigned to each of the 13 treatment groups (Table 1B).

191

192 e. Plant growth parameters and assessment of fruit quality

193

194 Dry Weight: Aboveground shoot biomass was collected at the conclusion of each  
195 experiment. Fruits were removed, plants were cut at soil level to remove the roots, and the  
196 shoots were completely dried in large paper bags at 60°C for 48 hours prior to weighing.

197

198 Yield: To measure yield, four random fruits per plant were selected for sampling at ‘Breaker’  
199 stage, which is defined as the point in developmental where less than 10% of surface area  
200 displays color change [49]. Following achievement of the ‘Red’ stage, the point in

201 development where greater than 90% of a fruit's surface area displays color change, fruit  
202 were collected at regular intervals throughout the remainder of the experiment [49]. The yield  
203 for each plant was quantified based on the total number of fruits and cumulative fruit weight.  
204  
205 Quality: Fruit quality was assessed by quantifying total soluble solids, sugars, and organic  
206 acid content. Briefly, a handheld rotary Bio-Homogenizer (model M133/1281-0 from  
207 Biospec Products Inc. Bartlesville, OK) was used to extract juice from five grams of fruit  
208 (flesh and peel tissue) from each of the four sampled fruit. Juice extracted from 'Red' stage  
209 fruit was filtered through cheese cloth and used for refractometer-based quantification of  
210 total soluble solids (TSS). An aliquot of the juice sample was quickly centrifuged, the  
211 resulting supernatant was filtered using 0.45  $\mu\text{m}$  pore size filters, and the sample stored at  
212  $-80^{\circ}\text{C}$  for later use in quantification of sugar and organic acid profiles. Fructose, glucose,  
213 citric acid, malic acid, and fumaric acid were quantified using a Varian Prostar 230 HPLC  
214 equipped with an Aminex HPX 87H column coupled to a refractive index (RI) and UV (210  
215 nm) detector. The column was eluted with 0.005M  $\text{H}_2\text{SO}_4$  at a flow rate of 0.6 mL/min at  
216  $65^{\circ}\text{C}$  [50]. Identification and quantification of sugars and organic acids was done by the  
217 external standard method [50].

218

219 f. Statistical analysis

220

221 All experiments were assessed independently. Data was analyzed with Rstudio (Version  
222 1.1.463) utilizing the Ggplot2 (Version 3.3.0), Tidyverse (Version 1.2.1), and Ggpubr

223 (Version 0.2.3) packages. Significance was tested using pairwise t-tests with  $\alpha$  set for 0.1,  
224 .05, and 0.01. Figures with one, two, and three stars represent significance at p-value of <0.1,  
225 <0.05 and <0.01, respectively. All raw data, statistical representations of the data, and t-test  
226 outputs are available in Supplementary Files 1 - 3.

227

### 228 **3. Results and Discussion**

229

230 a. Electron microscopy and EDX

231

232 Micrographs were recorded for each biochar at 100x and 1000x magnification. The plant  
233 residue biochars RGT and RT exhibited a more heterogeneous composition, exemplified by a  
234 broader range of particle sizes, in comparison with the walnut and thermomechanical pulp  
235 BC (Figure 1). The proprietary Cool Terra BC featured a more consistent structure, possibly  
236 due to post-pyrolysis modification. The micrographs represent a very small sample from each  
237 biochar and while more detailed analyses are needed, these results have allowed for the  
238 development of several hypotheses regarding how the BC molecular structure might impact  
239 various parameters when added to soil. Suffice to say that each feedstock generates biochar  
240 with unique microscopic structure, which more than likely imparts different physical and  
241 chemical properties (Figure 1).

242

243 Characterization of all BCs with EDX spectra facilitated qualitative estimation of the specific  
244 elements present in each BC. The EDX method is an analytical technique that relies on X-ray

245 excitation and its interaction with a given sample. The unique atomic structure of each  
246 element in a sample corresponds to distinctive peaks on the electromagnetic emission  
247 spectrum, allowing for chemical and elemental characterization [51]. Nitrogen (N),  
248 phosphorus (P), potassium (K), calcium (Ca), and silicon (Si) were the most abundant  
249 elements in all BC varieties (Table 1). Sulfur (S) and aluminum (Al) were found in three BCs  
250 (RT, Russian thistle, W, walnut, and CT, Cool Terra®), while chlorine (Cl), molybdenum  
251 (Mo), magnesium (Mg) and sodium (Na) were only scarcely distributed among the BCs.  
252 Ryegrass tailings (RT)-derived BC contained all analyzed elements except Cl and Na, while  
253 the only elements identified in walnut BC were N, P, Ca, and Al (Table 2). While this study  
254 used EDX to qualitatively assess BC elemental composition, it is feasible to use this  
255 methodology for quantitative elemental analysis [52]. The elemental composition observed is  
256 consistent with results of other studies that examined the chemical properties of BCs. These  
257 results indicate that feedstocks influence the chemical composition of their biochar  
258 derivatives, which vary further based on pyrolysis temperature, and retention time [53].

259

## 260 b. Plant growth parameters

261

262 The impact of different biochars on three cultivars of tomato was assessed by quantifying  
263 growth and fruit development parameters of the plants grown in the greenhouse, including:  
264 shoot dry weight, total fruit weight, and yield per plant.

265

### 266 i. Shoot Dry Weight

267

268 In ‘Oregon Spring,’ decreased shoot dry weight was observed under CT 0.5% (Exp1), RGS  
269 1% (Exp2), and RGT 0.5% (Exp2) BC treatments. However, RGS 1% (Exp1), RGT 1%  
270 (Exp1), and TMP 0.5% (Exp1) BC treatments resulted in increased shoot dry weight over  
271 control plants (Figure 2A). In ‘Heinz’, increased dry shoot biomass accumulation was  
272 observed following all BC treatments except RGS treatments and RGT 1% application in  
273 Exp 1. In Exp 2, biochar treatments RGT 0.5%, TMP 0.5% and W 0.5% resulted in decreased  
274 shoot dry weight (Figure 3A). For ‘Cobra’, an increase in shoot dry weight was observed in  
275 Exp1 with CT, RGS, RGT, and TMP BC applications of 1%, and with 0.5% Russian thistle  
276 BC. In Exp2, a decreased in shoot dry weight was recorded with RGS 0.5%, RGT 1%, and  
277 TMP 0.5% (Figure 4A).

278

279 The biomass data across treatments varied between the individual experiments conducted  
280 during different times of the year. This was most likely due to the well-documented changes  
281 in solar radiation during the year in greenhouse production, and the resulting influence on  
282 plant’s photosynthetic performance [54].

283

284 In several previous studies, an increase in dry weight was reported following BC application.  
285 When wheat bran-derived BC was applied at 14 t/ha rate in tomato production in the field,  
286 dry shoot and root vegetative biomass increased, reportedly due to increased soil fertility  
287 [32]. Similar results were reported with low-temperature cotton stalk BC in a greenhouse  
288 study [55]. A significant increase of up to 52% in shoot dry weight (and 36% increase in root

289 dry weight) was observed in BC-treated plants, in comparison to control plants irrigated with  
290 ground water, heavy metal-contaminated water, and sewage water irrigation.

291

292 ii. Fruit weight

293

294 a. 'Oregon Spring'

295

296 A range of responses was recorded in both experiments under certain treatments with  
297 'Oregon Spring' (Figure 3A). Interestingly, the two applications of TMP biochar induced  
298 contrasting plant responses in Exp1. The lower dose of TMP 0.5% resulted in fruit with an  
299 average mass of 89.9 grams per plant (se +/- 4.3) ( $p < 0.05$ ) compared to 99.6 grams (se +/-  
300 3.9) in control plants, a 9.7% decrease. The opposite result was obtained with the application  
301 of 1% TMP, with the fruit weight increasing 10.5% over control plants to 110.1 grams (se +/-  
302 6.6) ( $p < 0.05$ ).

303

304 b. 'Heinz'

305

306 Fruit weight was significantly increased in multiple biochar treatments for the 'Heinz'  
307 cultivar (Figure 3A). Average weight of control fruit samples ranged from 42.8 grams (se  
308 +/- 1) in Exp1 to 49.4 grams (se +/- 1.6) in Exp2. The increase in average fruit weight with  
309 applications of CT 0.5% ranged from 47.9 grams (se +/- 1.7) in Exp1 to 57.5 grams (se +/-  
310 2.4) in Exp2 with a p-value of  $< 0.01$  for both experiments. This resulted in an increased

311 average fruit weight of 11% in Exp1 and 16% in Exp2. Compared to control samples, RGT  
312 1% treatment also significantly increased average fruit weight in ‘Heinz’ by 4% ( $p<0.10$ ) in  
313 Exp1 and 9% ( $p<0.05$ ) in Exp2. Additionally, ‘Heinz’ fruit weight increased with both  
314 treatments of RT biochar with RT 1% in Exp2 increasing fruit weight by 14% resulting in an  
315 average fruit weight of 56.7 grams (se +/- 2.1) with significance at p value of  $<0.01$ . Walnut  
316 biochar at 1% application rate also significantly increased fruit weight in Exp1 to 46.2 grams  
317 (se +/- 1.8) ( $p<0.05$ ) and to 57.5 grams (se +/- 3.6) in Exp2 ( $p<0.01$ ), an increase of 7.9% and  
318 16.7%, respectively.

319

320 c. ‘Cobra’

321

322 ‘Cobra’ cultivar demonstrated only two significant changes in Exp1 for fruit weight (Figure  
323 4A). A 16% decrease in fruit weight was found following applications of TMP 0.5%  
324 ( $p<0.01$ ), while an 11% increase was shown with W 1% application ( $p<0.01$ ). In Exp2, both  
325 applications of RGT (Exp1,  $p<0.1$ ; Exp2,  $p<0.01$ ) and TMP (Exp1,  $p<0.01$ ; Exp2,  $p<0.05$ )  
326 resulted in increased fruit weights over control plants in addition to the lower doses of RGS  
327 ( $p<0.05$ ) and W at 0.5% ( $p<0.05$ ).

328

329 Previous studies with *Solanum lycopersicum* cv. ‘Brickyard’ in potted bags also showed a  
330 different trend. Tomato yield was reported to remain unchanged with 0.5, 1, 2, 4, or 8% BC  
331 applications versus controls in trials with ‘Cobra’ cultivar [56,57]. A field study with wheat  
332 bran BC applied at  $14 \text{ t ha}^{-1}$  reported no impact on fruit weight [32]. The lack of change in

333 average fruit weight most likely indicates that these studies did not have the appropriate  
334 biochar type for the specific cultivar to produce any significant effect. In this study, different  
335 treatments led to increased average fruit weights observed in ‘Heinz’, ‘Oregon Spring’ and  
336 ‘Cobra’, lending support to the original hypotheses.

337

### 338 iii. Yield Per Plant

339 In order to evaluate the BC effect on overall crop productivity, average yield per plant (YPP)  
340 was recorded. Two of the three cultivars demonstrated an increase in YPP, and no  
341 detrimental impact on yield was observed with any biochar treatment.

342

#### 343 a. ‘Oregon Spring’

344

345 Biochar treatments resulted in a significant yield change in ‘Oregon Spring’ cultivar. With  
346 applications of CT at 1%, significant increases were found in both experiments, with Exp 2  
347 data indicating a 17% increase ( $p < 0.01$ ) in yield. The average yield was 834.4 grams (se +/-  
348 43.9) compared to control plants at 710.3 grams (se +/- 33.4). In Exp 1, control plants  
349 averaged 634.9 grams (se +/- 27.5) and the CT 1% treatment resulted in a significant increase  
350 of 12% ( $p < 0.01$ ). Addition of RGS 1% and TMP 1% also significantly increased yields in  
351 comparison to the controls in both experiments, especially in Exp1, resulting in a 22% and  
352 12% increase ( $p < 0.01$ ), respectively. An increase in yield was also observed with RT and W  
353 biochars in both experiments, with no yield penalties recorded for any BC in either  
354 experiment.



355

356 b. 'Heinz'

357

358 In case of 'Heinz,' the YPP data varied across all BC treatments. Contrasting results for both  
359 experiments were obtained with 1% concentrations of RT, TMP, and W biochars. In Exp 2,  
360 addition of W BC at 0.5% resulted in decreased average yield per plant by 21% ( $p < 0.01$ ). In  
361 some cases, increased YPP was observed in Exp 1. Addition of RT 1% and W 0.5% increased  
362 yields by 28% and 25%, respectively. This translated to 686.6 grams and 672.2 grams of fruit  
363 per plant compared to 535.4 grams in control plants although, the results were reversed in  
364 Exp 2.

365

366 c. Cobra

367

368 The YPP in 'Cobra' varied across the BC treatments. In Exp 1, control plants averaged  
369 1488.2 grams (se +/- 54.9) of fruit while applications of RGT at 1% significantly increased  
370 the yield per plant by 20% ( $p < 0.01$ ) to an average of 1788.3 grams (se +/- 29.7). While  
371 control plants averaged 1053.7 grams (se +/- 74.1) in Exp 2, application of RGS at 0.5%  
372 resulted in an increase to 1380.7 grams (se +/- 126.5), a significant increase of 31% ( $p < 0.01$ ).  
373 Additional significant changes were found in Exp 2 for RT 1% applications, for which a yield  
374 increase of 25% ( $p < 0.01$ ) was observed. W 1% also raised yield by 19% ( $p < 0.05$ ).  
375 TMP-derived biochar at both concentrations had no effect on YPP.

376

377 The results of this study demonstrate that different BCs had a positive impact on the  
378 productivity of two cultivars, 'Cobra' and 'Oregon Spring', and only fruit quality metrics in  
379 'Heinz' (Figures 2A, 3A, and 4A). Also, a single biochar produced different responses in  
380 different cultivars. RGT biochar consistently enhanced yield in 'Cobra' but had no effect on  
381 the other cultivars. To the best of our knowledge this study is the first to demonstrate an  
382 interaction between different feedstock-derived biochars and the genetic background of the  
383 plant species.

384

385 The observations in this study are in concordance with a recent meta-analysis that  
386 summarized the results of 371 independent reports on the effect of biochar on plant  
387 productivity and nutrient cycling [44]. While the study found overall positive impact on  
388 aboveground biomass ( $n=67$ ,  $P < 0.01$ ), there were some instances where the BC had a  
389 neutral or even a negative impact on plant productivity. In this study, some BC-cultivar  
390 combinations enhanced the measured trait, while the majority were neutral, and some  
391 produced a negative effect. Interestingly, the experiments yielded contradictory results across  
392 the two experiments conducted at different times of the year. Additionally, a recent review on  
393 biochar and the effects on agriculture also supports the role of BC as a viable soil amendment  
394 to help improve crop productivity while stimulating other soil properties and microbial  
395 communities [43].

396

397 Previous reports on tomato and other crops have demonstrated mixed results. It was noted  
398 that there was an increase in tomato fruit diameter, and a significant yield increase in grape,

399 with BC and compost-amended soils [58]. Additional studies on tomato growth and  
400 development with biochar reported similar trends. A field trial with cultivar 'Trust' with 10 or  
401 20% (v/v) hardwood BC generated from balsam fir and spruce showed no difference in crop  
402 yield [59]. Tomato cultivar cv. 1402 grown in fertigated soilless media also reported no yield  
403 increases but did increase plant stature and leaf size. Pepper plants (*Capsicum annuum* L.)  
404 reported beneficial yield gains with addition of citrus wood biochar [60]. Enhanced  
405 abundance of rhizosphere microbes in addition to a hormesis effect that stimulated plant  
406 growth was reported [60].

407

408 Results from the above mentioned studies imply that there is a need to further characterize  
409 BC-plant interactions. Both the impact of the biological, physical and chemical changes in  
410 soil characteristics, and the role of genetic background of the plant will need to be considered  
411 if BC is to be deployed widely in agricultural production [43]. The observations summarized  
412 in Figures 2, 3 and 4 indicate that different BC treatments generated a unique response in  
413 each cultivar and that each cultivar responded uniquely to each BC treatment supporting both  
414 hypotheses of this study.

415

416 c. Assessment of fruit quality

417

418 i. °Brix

419

420 Total Soluble Solids (TSS) assays were conducted for each cultivar. The data indicated  
421 mixed results; two of the three cultivars displayed decreased °Brix, with only ‘Heinz’  
422 demonstrating an increased TSS level. The majority of BC treatments had no or negative  
423 effect on °Brix.

424

425 a. ‘Oregon Spring’

426

427 A range of TSS response in ‘Oregon Spring’ were observed. Amendment with Cool Terra®  
428 (CT) biochar at 1% resulted in fruit with significantly lower °Brix. In Exp 1, control fruit  
429 °Brix averaged 5.34 (se +/- 0.10) compared to the significantly lowered CT treatment °Brix  
430 of 5.04 (se +/- 0.14), a 5% decrease ( $p < 0.05$ ). A similar response in Exp 2 resulted in an 8%  
431 decrease of °Brix levels in CT 1% fruit versus control fruit. Surprisingly, the lower dose  
432 application of CT at 0.5% resulted in the highest TSS level measured in Exp 2, a 8.9%  
433 increase, at 6.58 (se +/- 0.15) with a p-value of  $< 0.01$ . These contrasting results necessitate  
434 further research to reveal the underlying plant-BC interaction mechanisms.

435

436 b. ‘Heinz’

437

438 Three BC feedstocks in ‘Heinz’ significantly impacted fruit TSS trends with no detrimental  
439 effects measured with any BC treatment or application rate. The data revealed consistently  
440 increased °Brix compared to controls with CT 0.5% and 1% ( $p < 0.01$ ), significantly  
441 increasing TSS by ~13% in Exp 1. This resulted in increased °Brix levels of 5.85 (se +/- 0.18)

442 in CT 0.5% and 5.84 (se +/- 0.17) in CT 1% treatments. More changes were found with RGS  
443 0.5% and RGT 0.5% resulting in °Brix levels increased 10% and 11%, respectively, over  
444 controls in Exp 1.

445

446 c. ‘Cobra’

447

448 The ‘Cobra’ cultivar responded comparably with only one biochar type, Ryegrass tailings.

449 The RGT amendment resulted in decreased °Brix at both rates and experimental trials. The

450 largest change was measured in Exp 1 with control fruit °Brix averaging 5.13 (se +/- 0.08),

451 while TMP 1% treatment reduced °Brix by 8% to 4.71 (se +/- 0.14). Further decreases of TSS

452 were found with all tested biochars in at least one experiment and one concentration.

453

454 Only the processing tomato, ‘Heinz,’ revealed increased °Brix concentrations in all biochar

455 treatments (except TMP 0.5%) and in both experiments. Conversely, ‘Cobra’ fruit displayed

456 significantly decreased °Brix levels for four of the six biochars . However, a spectrum of

457 effects was observed for the ‘Oregon Spring’ cultivar. These data supported both of the tested

458 hypotheses.

459

460 The beneficial results with ‘Heinz’ indicate this cultivar may be a potential candidate for

461 targeted fruit quality improvement with BC amendment. However, careful consideration of

462 other biochar-cultivar combinations is necessary, as demonstrated by the significantly

463 lowered °Brix levels in ‘Cobra’ cultivar. In a previous study with tomato cultivar ‘Rio

464 Grande', no substantial changes to the TSS levels were reported when grown in wheat-straw,  
465 poplar tree, or olive-residue BC-amended soils at 10% and 20% [61]. Variable response to  
466 different BC treatment in terms of °Brix was observed in this study as well. The  
467 multi-variable BC-plant-soil interactions along with the genetic background of the plant most  
468 likely influences TSS levels.

469

470 ii. Sugars

471

472 Producing flavorful tomatoes could be an advantage to producers, processors, and consumers  
473 alike. Sugars were quantified with HPLC to determine the carbohydrate load in tomato fruit  
474 in response to BC amendment.

475

476 a. 'Oregon Spring'

477

478 A wide range of responses were recorded in 'Oregon Spring' cultivar in response to various  
479 BC treatments (Figure 2B). Significant changes in glucose and fructose levels were recorded  
480 with RGS treatment at 0.5% in both experiments. In Exp 1, glucose concentrations were  
481 significantly increased by 18% ( $p < 0.01$ ) from 14.35  $\mu\text{g}/\mu\text{L}$  (se +/- 0.80) in control plants to  
482 16.98  $\mu\text{g}/\mu\text{L}$  (se +/- 1.26) in RGS treated plants. In Exp 2, fructose levels were also increased  
483 by 25% in RGS 0.5% treatment as indicated by the increase from 38.58  $\mu\text{g}/\mu\text{L}$  (se +/- 1.4) in  
484 control fruit to 48.28  $\mu\text{g}/\mu\text{L}$  (se +/- 3.37) ( $p < 0.01$ ).

485

486 b. 'Heinz'

487

488 Various significant differences were observed in 'Heinz' fruit carbohydrate levels (Figure  
489 3B). 'Heinz' demonstrated significantly increased glucose and fructose levels over control  
490 plants, with TMP 0.5% BC treatment ( $p < 0.01$ ). In Exp 1, TMP 0.5% increased fruit glucose  
491 levels by 27% from 13.06  $\mu\text{g}/\mu\text{L}$  (se +/- 0.95) in control fruit to 16.7  $\mu\text{g}/\mu\text{L}$  (se +/- 1.67).  
492 Fructose levels responded similarly, with a 30% increase from 25.52  $\mu\text{g}/\mu\text{L}$  (se +/- 2.16) in  
493 control fruit to 33.28  $\mu\text{g}/\mu\text{L}$  (se +/- 2.71) ( $p < 0.01$ ). However, applications of CT at 1%  
494 significantly decreased glucose by 24% ( $p < 0.01$ ) and fructose by 27% ( $p < 0.01$ ) in Exp 1,  
495 with similar trends in Exp 2.

496

497 c. 'Cobra'

498

499 Although significant differences were found in glucose levels, no consistent results were  
500 observed between the BC treatments in 'Cobra' (Figure 4B). Fructose levels were impacted  
501 by several biochar feedstocks and demonstrated significant decreases with 1% applications  
502 of CT, RGS, and RT. A steep decline in fructose was observed with both applications of W  
503 BC in Exp 1 lowering the levels by 25% and 27% compared to control fruit. The CT  
504 treatments incrementally lowered fructose levels with increasing BC rates from 30.18  $\mu\text{g}/\mu\text{L}$   
505 (se +/- 1.91) in the 0.5% treatment (13.8% decrease) to 27.78  $\mu\text{g}/\mu\text{L}$  (se +/- 3.54) in the 1%  
506 treatment (20.9% decrease) compared to 35.02  $\mu\text{g}/\mu\text{L}$  (se +/- 1.14) in the control fruits  
507 ( $p < 0.01$ ).

508

509 The impact of BC on carbohydrate levels in the three cultivars was highly diverse. In a  
510 previous study demonstrated that tomato TSS was negatively affected by olive-residue BC,  
511 indicative of BC-specific effects on tomato quality. Another study showed lower temperature  
512 (300 C°) BC treatments resulted in increased sugar levels in ‘Micro-Tom’ tomato in a pot  
513 study with BC derived from bamboo feedstock [62]. These results further indicate a BC  
514 specific effect on fruit quality that is also dependent on the genetic background of the  
515 cultivar.

516

517 iii. Organic acids

518

519 Similar to other traits, a range of responses was recorded for the quantified organic acids.  
520 ‘Oregon Spring’ demonstrated a strong response to BC treatments, especially in terms of  
521 malic acid (MA) levels, which increased in both the experiments and rates using RGS, RGT,  
522 and RT BC. Compared to controls, plants amended with RGT 1% resulted in significantly  
523 higher MA production as shown in Exp 1 (63%) and Exp 2 (30%). Additionally, in Exp 1,  
524 RT 0.5% amendment resulted in a significant increase of 80% in MA levels from 0.89 µg/µL  
525 (se +/- 0.07) in control fruits to 1.60 µg/µL (se +/- 0.15) in treated fruits (p<0.01). Other BC  
526 treatments in Exp 1 also significantly (p<0.01) altered MA levels in ‘Oregon Spring’ as W  
527 1% and TMP 1% increased MA by 74% and 80% while CT 1% decreased MA by 18% to  
528 0.73 µg/µL (se +/- 0.05) (Figure 2B).

529



530 A similar pattern of variable but significant changes was recorded in the ‘Heinz’ cultivar. In  
531 Exp 1, applications of RT BC at 1% increased citric acid levels by 66% ( $p < 0.01$ ) and malic  
532 acid concentrations by 58% ( $p < 0.05$ ). A significant difference ( $p < 0.01$ ) was found with CT  
533 1% treatment, which reduced the MA levels from  $1.08 \mu\text{g}/\mu\text{L}$  (se  $\pm 0.09$ ) in control fruit to  
534  $0.63 \mu\text{g}/\mu\text{L}$  (se  $\pm 0.10$ ), a 41% decrease in Exp 1. Conversely, MA levels in Exp 2  
535 significantly increased ( $p < 0.01$ ) by 25% with TMP 0.5% treatment compared to control fruit  
536 (Figure 3B).

537

538 In the ‘Cobra’ cultivar citric acid (CA) and malic acid (MA) levels decreased significantly  
539 ( $p < 0.01$ ) in Exp 1 with 0.5% Walnut biochar: CA decreased 27% and MA decreased by 16%.  
540 No decreases were observed in Exp 2 with W BC but RGT BC at 0.5% increased CA (21%)  
541 and MA (11.5%) concentrations significantly ( $p < 0.01$ ) (Figure 4B).

542

543 A previous study showed that tomato fruit quality, specifically CA, did not statistically  
544 improve between BC treatments and even showed a significant decrease with 10%  
545 olive-residue BC [61]. The generally positive response to BC amendment in the ‘Oregon  
546 Spring’ cultivar in terms of organic acids compared to the other cultivars most likely  
547 indicates a more favorable plant-soil-genetic background interaction. These data support  
548 both hypotheses as each biochar affected fruit quality differently, and each cultivar had a  
549 unique response to each BC (Figure 2B, 3B, and 4B).

550

551 **4. Conclusion**

552

553 The data presented in this study supports both the hypotheses, 1.) Biochars derived from  
554 different feedstock sources will produce unique phenotypes in a single cultivar of tomato,  
555 and 2.) a single feedstock-derived biochar will produce different phenotypes in each of the  
556 three tomato cultivars. The results indicate towards future experiments to focus on  
557 understanding all BC-related variables, the significance of their contribution individually and  
558 in an interactive context when added to soil. There is a need to adopt a customized approach  
559 for BC application in order to enhance yield and quality of the crop [24,33,43,63]. Future BC  
560 studies should evaluate multiple crop cultivars in conjunction with different classes of  
561 biochar (ex. manure, hardwood, or crop residue), to dissect the nature of the complex  
562 interactions.

563

564 In summary, in ‘Oregon Spring’, a preferred tomato variety for backyard production, the  
565 yield per plant and malic acid were seen to be enhanced, and there was a general consensus  
566 between the two experiments for these two traits. Overall, CT 0.5%, and RGS 0.5%  
567 treatments were most suitable for enhancing fruit quality traits. The results from the  
568 processing tomato, ‘Heinz,’ were different. Most BC-treatments enhanced growth and  
569 development traits. However, °Brix and other fruit quality traits were negatively impacted  
570 except for TMP 0.5% treatment. ‘Cobra’, a variety bred for greenhouse production, showed  
571 enhanced yields in all experiments and most BC combinations; however, fruit quality traits  
572 varied across all BC treatments. While additional experimentation is required to understand  
573 the wide-ranging variability in responses, several possible variables can influence the

574 outcomes, including: feedstock, potting mix, biochar characteristics, microcosm,  
575 environmental factors, production management and the genetic background of the plant.  
576 The observations recorded in this study should be considered with the caveat that the  
577 experiments were conducted in a greenhouse. Use of potting mix eliminated all the  
578 soil-related dynamics that may have influenced the agronomic performance and fruit traits.  
579 Nevertheless, the study demonstrates that the genetic background of the plant is an important  
580 variable. Prospective field evaluation of biochar should include different cultivars of the  
581 species being tested. Moreover, the productivity of future agroecosystems will be measured  
582 by the intensity of current attempts to improve soil health; therefore, methods that improve  
583 and maintain soil health should be incorporated and evaluated rigorously.

584

#### 585 **Declarations**

586 Ethics approval and consent to participate: Not applicable

587 Consent for publication: Not applicable

588 Availability of data and material: The datasets supporting the conclusions of this article are  
589 included within the article and its additional files.

590 Competing interests: AD serves as a consultant for AgEnergy Solutions – a biochar  
591 production startup company based in Spokane, WA, USA. AgEnergy Solutions had no role  
592 in the design of the study; in the collection, analyses, or interpretation of data; in the writing  
593 of the manuscript, or in the decision to publish the results.

594 Funding: This work in the Dhingra lab was supported in part by Washington State University  
595 Agriculture Research Center Hatch Grant WNP00011 and support from the Stump Farmer  
596 Farms, Sprague, WA and the Cowles Family, Spokane, WA.

597 Author Contributions: Conceptualization, AD, DI; Methodology, DI, ET, RG, AD; Formal  
598 Analysis, ET, RG, AD; Resources, AD; Writing – Original Draft Preparation, ET, AD;  
599 Writing – Review & Editing, ET, RG, AD; Supervision, AD; Funding Acquisition, AD,

600 Acknowledgments: The authors thank Dr. Seanna Hewitt and Evan Stowe for their critical  
601 reading of the manuscript and their feedback. The authors also thank Milica Radanovic for  
602 help with statistical analysis. The authors are thankful to Dr. Seanna Hewitt and Robert Nica  
603 for designing the graphical abstract.

604 Figure Title and Legends

605 Figure 1: Scanning electron micrographs of different biochars used in this study. (100x  
606 magnification and a 1mm scale bar standard). The high heterogeneity of BC is apparent when  
607 BC is derived from different feedstocks.

608

609 Figure 2: Impact of different Biochars on *Solanum lycopersicum* var. 'Oregon Spring'  
610 production. A. Agronomic response of 'Oregon Spring' cultivar to different BC amendments  
611 recorded in terms of biomass, average total fruit weight, and yield per plant (YPP). B. Impact  
612 of different Biochars on fruit quality parameters - °Brix, Glucose, Fructose, Citric Acid and  
613 Malic Acid.

614

615 Figure 3: Impact of different Biochars on *Solanum lycopersicum* var. 'Heinz' production.  
616 A. Agronomic response of 'Heinz' cultivar to different BC amendments recorded in terms of  
617 biomass, average total fruit weight, and yield per plant (YPP). B. Impact of different  
618 Biochars on fruit quality parameters - °Brix, Glucose, Fructose, Citric Acid and Malic Acid.

619

620 Figure 5 Impact of different Biochars on *Solanum lycopersicum* var. 'Cobra' production. A.  
621 Agronomic response of 'Cobra' cultivar to different BC amendments recorded in terms of  
622 biomass, average fruit weight, and yield per plant (YPP). B. Impact of different Biochars on  
623 fruit quality parameters - °Brix, Glucose, Fructose, Citric Acid and Malic Acid.

624

625

626 **References**

- 627 1. Cotching WE. Organic matter in the agricultural soils of Tasmania, Australia – A review.  
628 Geoderma. Elsevier B.V.; 2018. p. 170–82.
- 629 2. Lal R. Soil health and carbon management. Food Energy Secur [Internet].  
630 Wiley-Blackwell Publishing Ltd; 2016 [cited 2020 Apr 16];5:212–22. Available from:  
631 <http://doi.wiley.com/10.1002/fes3.96>
- 632 3. Novotny EH, Hayes MHB, Madari BE, Bonagamba TJ, deAzevedo ER, de Souza AA, et  
633 al. Lessons from the Terra Preta de Índios of the Amazon Region for the utilisation of  
634 charcoal for soil amendment. J. Braz. Chem. Soc. Sociedade Brasileira de Quimica; 2009. p.  
635 1003–10.
- 636 4. Steiner C, Teixeira WG, Lehmann J, Nehls T, De MacÊdo JLV, Blum WEH, et al. Long  
637 term effects of manure, charcoal and mineral fertilization on crop production and fertility on  
638 a highly weathered Central Amazonian upland soil. Plant Soil. Springer; 2007;291:275–90.
- 639 5. Zech W, Haumaier L, Reinhold H. Ecological aspects of soil organic matter in tropical  
640 land use. Humic Subst soil Crop Sci Sel readings. Soil Science Society of America;  
641 1990;187–202.
- 642 6. Basso B, Dumont B, Maestrini B, Shcherbak I, Robertson GP, Porter JR, et al. Soil  
643 Organic Carbon and Nitrogen Feedbacks on Crop Yields under Climate Change. Agric  
644 Environ Lett [Internet]. Wiley; 2018 [cited 2020 Apr 16];3:180026. Available from:  
645 <http://doi.wiley.com/10.2134/aer2018.05.0026>
- 646 7. Magdoff F. Ecological agriculture: Principles, practices, and constraints [Internet]. Renew.  
647 Agric. Food Syst. Cambridge University Press; [cited 2020 Jun 19]. p. 109–17. Available

648 from: <https://www.jstor.org/stable/44491442>

649 8. Doran JW, Zeiss MR. Soil health and sustainability: Managing the biotic component of  
650 soil quality. *Appl Soil Ecol*. Elsevier; 2000;15:3–11.

651 9. Bender SF, Wagg C, van der Heijden MGA. An Underground Revolution: Biodiversity  
652 and Soil Ecological Engineering for Agricultural Sustainability. *Trends Ecol. Evol*. Elsevier  
653 Ltd; 2016. p. 440–52.

654 10. Lehtinen T, Schlatter N, Baumgarten A, Bechini L, Krüger J, Grignani C, et al. Effect of  
655 crop residue incorporation on soil organic carbon and greenhouse gas emissions in European  
656 agricultural soils. *Soil Use Manag* [Internet]. Blackwell Publishing Ltd; 2014 [cited 2020 Jun  
657 19];30:524–38. Available from: <http://doi.wiley.com/10.1111/sum.12151>

658 11. Quinton JN, Govers G, Van Oost K, Bardgett RD. The impact of agricultural soil erosion  
659 on biogeochemical cycling. *Nat Geosci*. Nature Publishing Group; 2010;3:311–4.

660 12. Neves EG, Petersen JB, Bartone RN, Augusto Da Silva C. Historical and Socio-cultural  
661 Origins of Amazonian Dark Earth. In: Lehmann J, Kern DC, Glaser B, Wodos WI, editors.  
662 *Amaz Dark Earths* [Internet]. Dordrecht: Kluwer Academic Publishers; 2004. p. 29–50.  
663 Available from: [http://link.springer.com/10.1007/1-4020-2597-1\\_3](http://link.springer.com/10.1007/1-4020-2597-1_3)

664 13. Rasyid G, Saputra N. A review paper: the potency of biochar as bioconditioner and  
665 carbon-offset. *IOP Conf Ser Earth Environ Sci*. 2020;415:12008.

666 14. Bezerra J, Turnhout E, Vasquez IM, Rittl TF, Arts B, Kuyper TW. The promises of the  
667 Amazonian soil: shifts in discourses of Terra Preta and biochar. *J Environ Policy Plan*.  
668 Routledge; 2019;21:623–35.

669 15. Daniele C de O, Mauro W de O, Vinicius SG da S, Terezinha BAO, Hugo HC do N,

- 670 Siglea S de FC. Nutritional status of three sugarcane varieties grown in the northeast region  
671 of Brazil. *African J Agric Res. Academic Journals*; 2019;14:532–8.
- 672 16. Ogawa M, Okimori Y. Pioneering works in biochar research, Japan. *Soil Res* [Internet].  
673 CSIRO PUBLISHING; 2010 [cited 2020 Apr 16];48:489. Available from:  
674 <http://www.publish.csiro.au/?paper=SR10006>
- 675 17. Spokas KA, Cantrell KB, Novak JM, Archer DW, Ippolito JA, Collins HP, et al. Biochar:  
676 A Synthesis of Its Agronomic Impact beyond Carbon Sequestration. *J Environ Qual. Wiley*;  
677 2012;41:973–89.
- 678 18. Laird DA. The charcoal vision: A win-win-win scenario for simultaneously producing  
679 bioenergy, permanently sequestering carbon, while improving soil and water quality. *Agron*  
680 *J.* 2008;100:178–81.
- 681 19. Gurwick NP, Moore LA, Kelly C, Elias P. A Systematic Review of Biochar Research,  
682 with a Focus on Its Stability in situ and Its Promise as a Climate Mitigation Strategy. Sun Q,  
683 editor. *PLoS One* [Internet]. 2013;8:e75932. Available from:  
684 <http://dx.plos.org/10.1371/journal.pone.0075932>
- 685 20. Nair A, Lang K, Snyder D. Impact of Biochar and Fertility Management on Potato  
686 Production [Internet]. 2018. Available from:  
687 [https://lib.dr.iastate.edu/cgi/viewcontent.cgi?article=1432&context=farmprogressrepor](https://lib.dr.iastate.edu/cgi/viewcontent.cgi?article=1432&context=farmprogressreports&unstamped=1)  
688 [ts&unstamped=1](https://lib.dr.iastate.edu/cgi/viewcontent.cgi?article=1432&context=farmprogressreports&unstamped=1)
- 689 21. Muhammad N, Dai Z, Xiao K, Meng J, Brookes PC, Liu X, et al. Changes in microbial  
690 community structure due to biochars generated from different feedstocks and their  
691 relationships with soil chemical properties. *Geoderma* [Internet]. Elsevier; 2014 [cited 2019



- 692 Nov 15];226–227:270–8. Available from:
- 693 <https://www.sciencedirect.com/science/article/pii/S0016706114000500>
- 694 22. Jiang Z, Lian F, Wang Z, Xing B. The role of biochars in sustainable crop production and  
695 soil resiliency. *J Exp Bot* [Internet]. 2019;71:520–42. Available from:  
696 <https://doi.org/10.1093/jxb/erz301>
- 697 23. Smith P. Soil carbon sequestration and biochar as negative emission technologies. *Glob*  
698 *Chang Biol* [Internet]. Blackwell Publishing Ltd; 2016 [cited 2020 Feb 18];22:1315–24.  
699 Available from: <http://doi.wiley.com/10.1111/gcb.13178>
- 700 24. Panwar NL, Pawar A, Salvi BL. Comprehensive review on production and utilization of  
701 biochar. *SN Appl Sci* [Internet]. Springer; 2019 [cited 2019 Dec 14];1:168. Available from:  
702 <http://link.springer.com/10.1007/s42452-019-0172-6>
- 703 25. Flowers MD, Lal R. Axle load and tillage effects on soil physical properties and soybean  
704 grain yield on a mollic ochraqualf in northwest Ohio. *Soil Tillage Res.* Elsevier;  
705 1998;48:21–35.
- 706 26. Dai Z, Zhang X, Tang C, Muhammad N, Wu J, Brookes PC, et al. Potential role of  
707 biochars in decreasing soil acidification-A critical review. *Sci Total Environ.* Elsevier;  
708 2017;581:601–11.
- 709 27. Laghari M, Naidu R, Xiao B, Hu Z, Mirjat MS, Hu M, et al. Recent developments in  
710 biochar as an effective tool for agricultural soil management: a review. *J Sci Food Agric*  
711 [Internet]. John Wiley & Sons, Ltd; 2016 [cited 2019 Nov 12];96:4840–9. Available from:  
712 <http://doi.wiley.com/10.1002/jsfa.7753>
- 713 28. Bruun EW, Petersen CT, Hansen E, Holm JK, Hauggaard-Nielsen H. Biochar

- 714 amendment to coarse sandy subsoil improves root growth and increases water retention. Soil  
715 Use Manag [Internet]. John Wiley & Sons, Ltd (10.1111); 2014;30:109–18. Available from:  
716 <https://doi.org/10.1111/sum.12102>
- 717 29. Chen Q, Qin J, Sun P, Cheng Z, Shen G. Cow dung-derived engineered biochar for  
718 reclaiming phosphate from aqueous solution and its validation as slow-release fertilizer in  
719 soil-crop system. J Clean Prod [Internet]. Elsevier; 2018 [cited 2019 Nov 21];172:2009–18.  
720 Available from: <https://www.sciencedirect.com/science/article/pii/S0959652617328974>
- 721 30. Liu B, Cai Z, Zhang Y, Liu G, Luo X, Zheng H. Comparison of efficacies of peanut shell  
722 biochar and biochar-based compost on two leafy vegetable productivity in an infertile land.  
723 Chemosphere [Internet]. Pergamon; 2019 [cited 2019 Dec 18];224:151–61. Available from:  
724 <https://www.sciencedirect.com/science/article/pii/S0045653519303248>
- 725 31. Haider G, Steffens D, Moser G, Müller C, Kammann CI. Biochar reduced nitrate leaching  
726 and improved soil moisture content without yield improvements in a four-year field study.  
727 Agric Ecosyst Environ [Internet]. Elsevier; 2017 [cited 2019 Dec 4];237:80–94. Available  
728 from: <https://www.sciencedirect.com/science/article/pii/S0167880916306016?via%3Dihub>
- 729 32. Vaccari F., Maienza A, Miglietta F, Baronti S, Di Lonardo S, Giagnoni L, et al. Biochar  
730 stimulates plant growth but not fruit yield of processing tomato in a fertile soil. Agric Ecosyst  
731 Environ [Internet]. Elsevier; 2015 [cited 2019 Dec 6];207:163–70. Available from:  
732 <https://www.sciencedirect.com/science/article/pii/S0167880915001474>
- 733 33. El-Naggar A, Lee SS, Rinklebe J, Farooq M, Song H, Sarmah AK, et al. Biochar  
734 application to low fertility soils: A review of current status, and future prospects. Geoderma  
735 [Internet]. Elsevier; 2019 [cited 2019 Dec 14];337:536–54. Available from:

- 736 <https://www.sciencedirect.com/science/article/pii/S0016706118309686>
- 737 34. Ding Y, Liu Y, Liu S, Li Z, Tan X, Huang X, et al. Biochar to improve soil fertility. A  
738 review. *Agron. Sustain. Dev.* Springer-Verlag France; 2016. p. 1–18.
- 739 35. Thi Thu Hien T, Shinogi Y, Taniguchi T, Hien TTT, Shinogi Y, Taniguchi T. The  
740 Different Expressions of Draft Cherry Tomato Growth, Yield, Quality under Bamboo and  
741 Rice Husk Biochars Application to Clay Loamy Soil. *Agric Sci* [Internet]. Scientific  
742 Research Publishing; 2017 [cited 2019 Dec 5];08:934–48. Available from:  
743 <http://www.scirp.org/journal/doi.aspx?DOI=10.4236/as.2017.89068>
- 744 36. Woldetsadik D, Drechsel P, Marschner B, Itanna F, Gebrekidan H. Effect of biochar  
745 derived from faecal matter on yield and nutrient content of lettuce (*Lactuca sativa*) in two  
746 contrasting soils. *Environ Syst Res* [Internet]. SpringerOpen; 2018 [cited 2019 Dec 5];6:2.  
747 Available from:  
748 [http://environmentalsystemsresearch.springeropen.com/articles/10.1186/s40068-017-0082-](http://environmentalsystemsresearch.springeropen.com/articles/10.1186/s40068-017-0082-9)  
749 9
- 750 37. Velez TI, Moonilall NI, Reed S, Jayachandran K, Scinto LJ. Impact of melaleuca  
751 quinquenervia biochar on phaseolus vulgaris growth, soil nutrients, and microbial gas flux. *J*  
752 *Environ Qual.* American Society of Agronomy, Crop Science Society of America, Soil  
753 Science Society of America; 2018;47:1487–95.
- 754 38. Nzediegwu C, Prasher S, Elsayed E, Dhiman J, Mawof A, Patel R. Effect of biochar on  
755 heavy metal accumulation in potatoes from wastewater irrigation. *J Environ Manage.*  
756 2019;232:153–64.
- 757 39. Li S, Shanguan Z. Positive effects of apple branch biochar on wheat yield only appear at

- 758 a low application rate, regardless of nitrogen and water conditions. *J Soils Sediments*  
759 [Internet]. 2018 [cited 2019 Dec 5];18:3235–43. Available from:  
760 <http://link.springer.com/10.1007/s11368-018-1994-3>
- 761 40. Faloye OT, Alatisè MO, Ajayi AE, Ewulo BS. Effects of biochar and inorganic fertiliser  
762 applications on growth, yield and water use efficiency of maize under deficit irrigation. *Agric*  
763 *Water Manag.* Elsevier B.V.; 2019;217:165–78.
- 764 41. Gao S, DeLuca TH. Wood biochar impacts soil phosphorus dynamics and microbial  
765 communities in organically-managed croplands. *Soil Biol Biochem* [Internet]. Pergamon;  
766 2018 [cited 2019 Nov 22];126:144–50. Available from:  
767 <https://www.sciencedirect.com/science/article/pii/S0038071718302979>
- 768 42. Xiao X, Chen B, Chen Z, Zhu L, Schnoor JL. Insight into Multiple and Multilevel  
769 Structures of Biochars and Their Potential Environmental Applications: A Critical Review.  
770 *Environ Sci Technol* [Internet]. American Chemical Society; 2018 [cited 2019 Nov  
771 21];52:5027–47. Available from: <https://pubs.acs.org/doi/10.1021/acs.est.7b06487>
- 772 43. Tenic E, Ghogare R, Dhingra A. Biochar - A Panacea for Agriculture or Just Carbon?  
773 Preprints; 2020;
- 774 44. Biederman LA, Harpole WS. Biochar and its effects on plant productivity and nutrient  
775 cycling: a meta-analysis. *GCB Bioenergy* [Internet]. John Wiley & Sons, Ltd;  
776 2013;5:202–14. Available from: <https://doi.org/10.1111/gcbb.12037>
- 777 45. Takaragawa H, Yabuta S, Watanabe K, Kawamitsu Y. Effects of Application of Bagasse-  
778 and Sunflower Residue-derived Biochar to Soil on Growth and Yield of Oilseed Sunflower.  
779 *Trop Agric Dev.* 2017;61:32–9.

- 780 46. Beauchamp EG, Kannenberg LW, Hunter RB. Nitrogen Accumulation and Translocation  
781 in Corn Genotypes Following Silking1. *Agron J* [Internet]. 1976;68:418. Available from:  
782 <https://www.agronomy.org/publications/aj/abstracts/68/2/AJ0680020418>
- 783 47. Siciliano SD, Fortin N, Mihoc A, Wisse G, Labelle S, Beaumier D, et al. Selection of  
784 Specific Endophytic Bacterial Genotypes by Plants in Response to Soil Contamination. *Appl*  
785 *Environ Microbiol* [Internet]. 2001;67:2469–75. Available from:  
786 <http://aem.asm.org/cgi/doi/10.1128/AEM.67.6.2469-2475.2001>
- 787 48. Richard-Molard C, Krapp A, Brun F, Ney B, Daniel-Vedele F, Chaillou S. Plant response  
788 to nitrate starvation is determined by N storage capacity matched by nitrate uptake capacity  
789 in two *Arabidopsis* genotypes. *J Exp Bot* [Internet]. 2008;59:779–91. Available from:  
790 <https://academic.oup.com/jxb/article-lookup/doi/10.1093/jxb/erm363>
- 791 49. López Camelo AF, Gómez PA. Comparison of color indexes for tomato ripening. *Hortic*  
792 *Bras. FapUNIFESP (SciELO)*; 2004;22:534–7.
- 793 50. Hewitt SL, Ghogare R, Dhingra A. Glyoxylic acid overcomes 1-MCP-induced blockage  
794 of fruit ripening in *Pyrus communis* L. var. ‘D’Anjou.’ *Sci Rep* [Internet]. Nature Research;  
795 2020 [cited 2020 Jun 20];10:1–14. Available from:  
796 <https://www.nature.com/articles/s41598-020-63642-z>
- 797 51. Goldstein JI, Newbury DE, Echlin P, Joy DC, Lyman CE, Lifshin E, et al. X-Ray Spectral  
798 Measurement: EDS and WDS. *Scanning Electron Microsc X-ray Microanal*. Springer US;  
799 2003. p. 297–353.
- 800 52. Ma X, Zhou B, Budai A, Jeng A, Hao X, Wei D, et al. Study of Biochar Properties by  
801 Scanning Electron Microscope – Energy Dispersive X-Ray Spectroscopy (SEM-EDX).

- 802 Commun Soil Sci Plant Anal. Taylor and Francis Inc.; 2016;47:593–601.
- 803 53. Prakongkep N, Gilkes RJ, Wiriyaakitnateekul W. Forms and solubility of plant nutrient  
804 elements in tropical plant waste biochars. J Plant Nutr Soil Sci [Internet]. John Wiley & Sons,  
805 Ltd; 2015 [cited 2019 Dec 9];178:732–40. Available from:  
806 <http://doi.wiley.com/10.1002/jpln.201500001>
- 807 54. Higashide T. Prediction of tomato yield on the basis of solar radiation before anthesis  
808 under warm greenhouse conditions. HortScience. 2009;44:1874–8.
- 809 55. Abid M, Danish S, Zafar-ul-Hye M, Shaaban M, Iqbal MM, Rehim A, et al. Biochar  
810 increased photosynthetic and accessory pigments in tomato (*Solanum lycopersicum* L.)  
811 plants by reducing cadmium concentration under various irrigation waters. Environ Sci  
812 Pollut Res [Internet]. Springer Berlin Heidelberg; 2017 [cited 2019 Dec 6];24:22111–8.  
813 Available from: <http://link.springer.com/10.1007/s11356-017-9866-8>
- 814 56. Goldy R, Wendzel V, Care P. Biochar as a Soil Amendment in a High Tunnel , Polybag  
815 Growth System. Midwest Veg Trial Rep. 2014;1–7.
- 816 57. Goldy R, Andres C, Wendzel V. Second year results using biochar as a soil amendment in  
817 a high-tunnel, poly bag growth system. 2016.
- 818 58. Sánchez-Monedero MA, Cayuela ML, Sánchez-García M, Vandecasteele B, D’Hose T,  
819 López G, et al. Agronomic Evaluation of Biochar, Compost and Biochar-Blended Compost  
820 across Different Cropping Systems: Perspective from the European Project FERTIPLUS.  
821 Agronomy [Internet]. Multidisciplinary Digital Publishing Institute; 2019 [cited 2019 Dec  
822 9];9:225. Available from: <https://www.mdpi.com/2073-4395/9/5/225>
- 823 59. Dorais M, Gagnon F, Laurin-Lanctôt S, Thériault M, Ménard C, Pepin S. Short-term

824 improvement of soil biological activity in biochar-amended organic greenhouse tomato  
825 crops. *Acta Hort* [Internet]. 2017 [cited 2019 Dec 9];249–56. Available from:  
826 [https://www.actahort.org/books/1164/1164\\_32.htm](https://www.actahort.org/books/1164/1164_32.htm)

827 60. Graber ER, Harel YM, Kolton M, Cytryn E, Silber A, David DR, et al. Biochar impact on  
828 development and productivity of pepper and tomato grown in fertigated soilless media. *Plant*  
829 *Soil*. Springer; 2010;337:481–96.

830 61. Petruccelli R, Bonetti A, Traversi ML, Faraloni C, Valagussa M, Pozzi A. Influence of  
831 biochar application on nutritional quality of tomato (*Lycopersicon esculentum*). *Crop Pasture*  
832 *Sci* [Internet]. CSIRO PUBLISHING; 2015 [cited 2019 Dec 6];66:747. Available from:  
833 <http://www.publish.csiro.au/?paper=CP14247>

834 62. Suthar R, Wang C, Nunes M, Chen J, Sargent S, Bucklin R, et al. Bamboo Biochar  
835 Pyrolyzed at Low Temperature Improves Tomato Plant Growth and Fruit Quality.  
836 *Agriculture* [Internet]. Multidisciplinary Digital Publishing Institute; 2018 [cited 2019 Dec  
837 9];8:153. Available from: <http://www.mdpi.com/2077-0472/8/10/153>

838 63. Yu H, Zou W, Chen J, Chen H, Yu Z, Huang J, et al. Biochar amendment improves crop  
839 production in problem soils: A review. *J Environ Manage* [Internet]. Academic Press; 2019  
840 [cited 2019 Dec 14];232:8–21. Available from:  
841 <https://www.sciencedirect.com/science/article/pii/S0301479718312593>

842

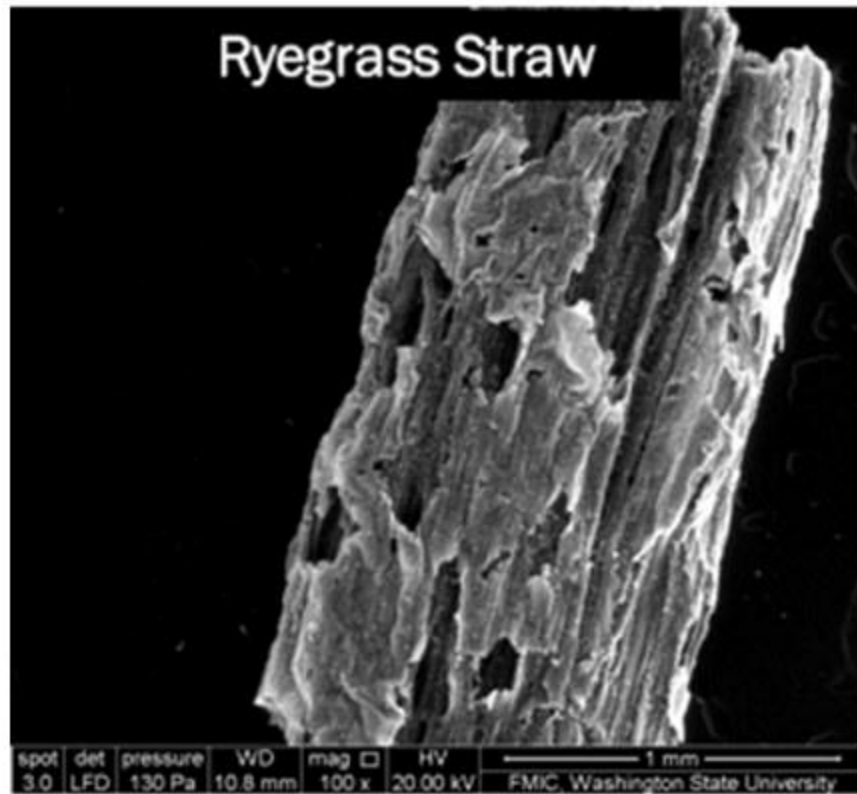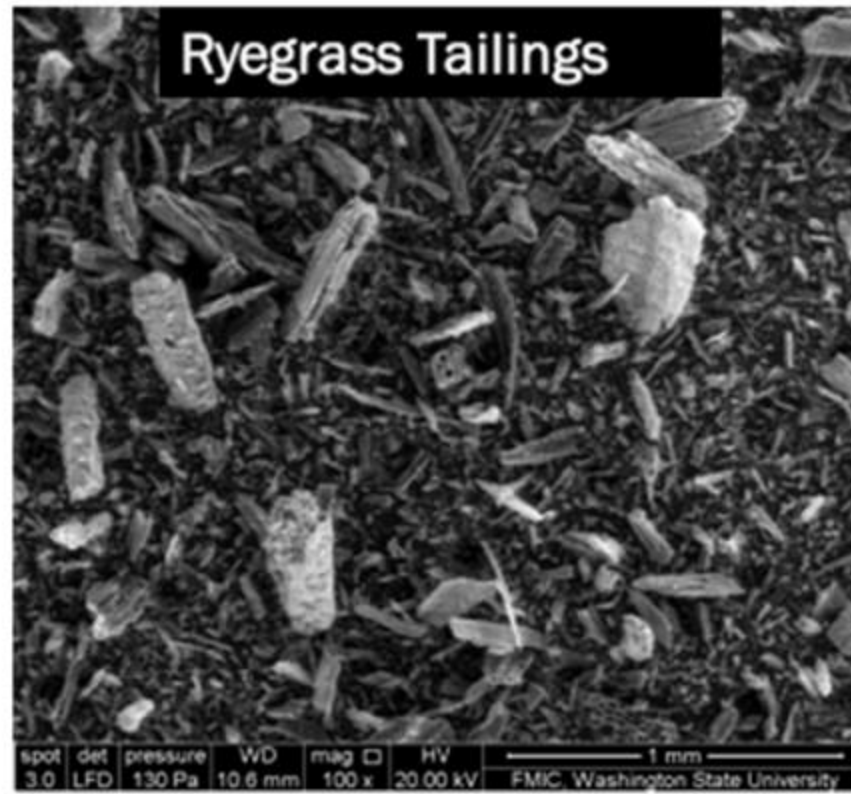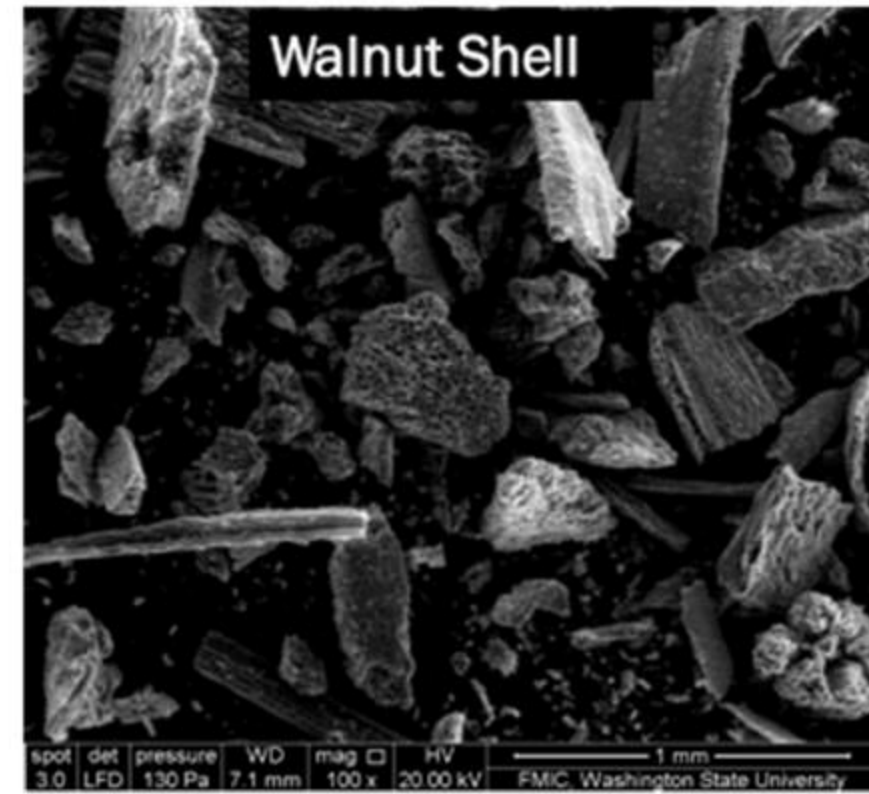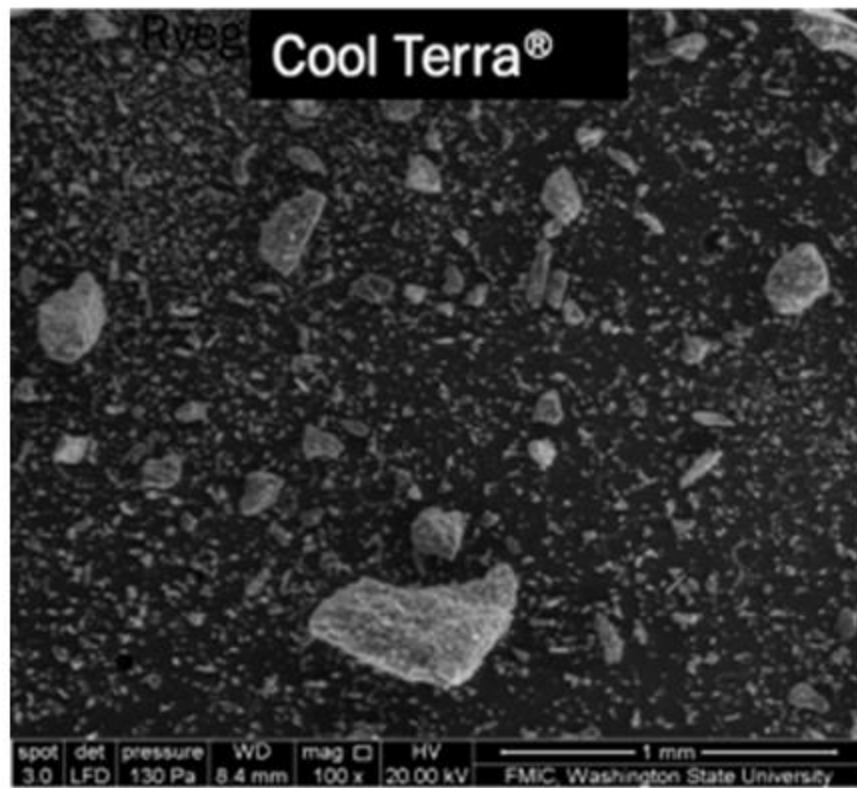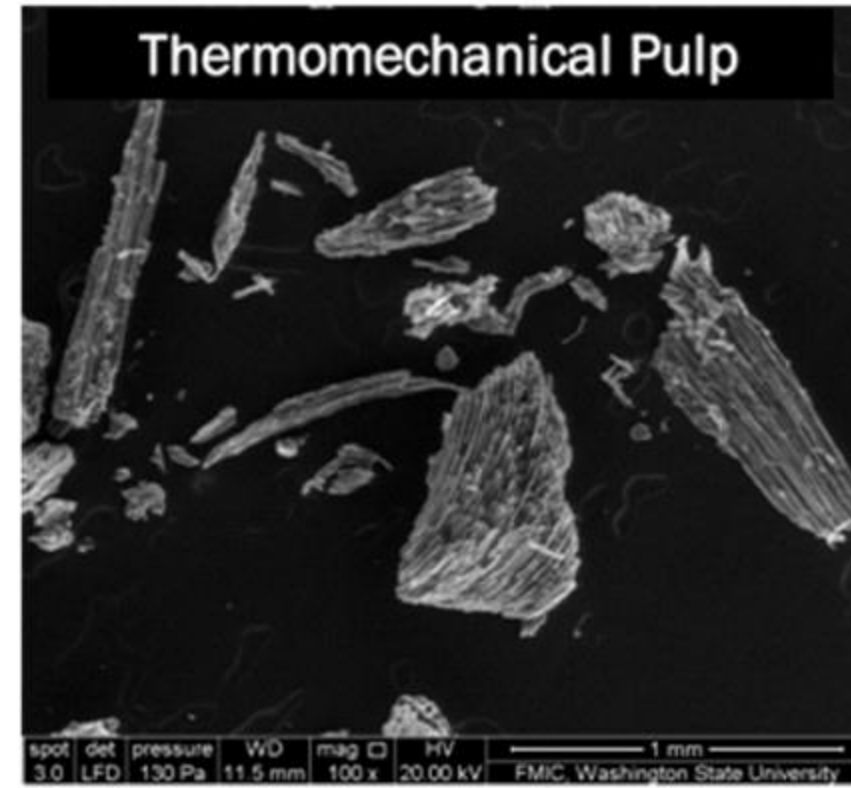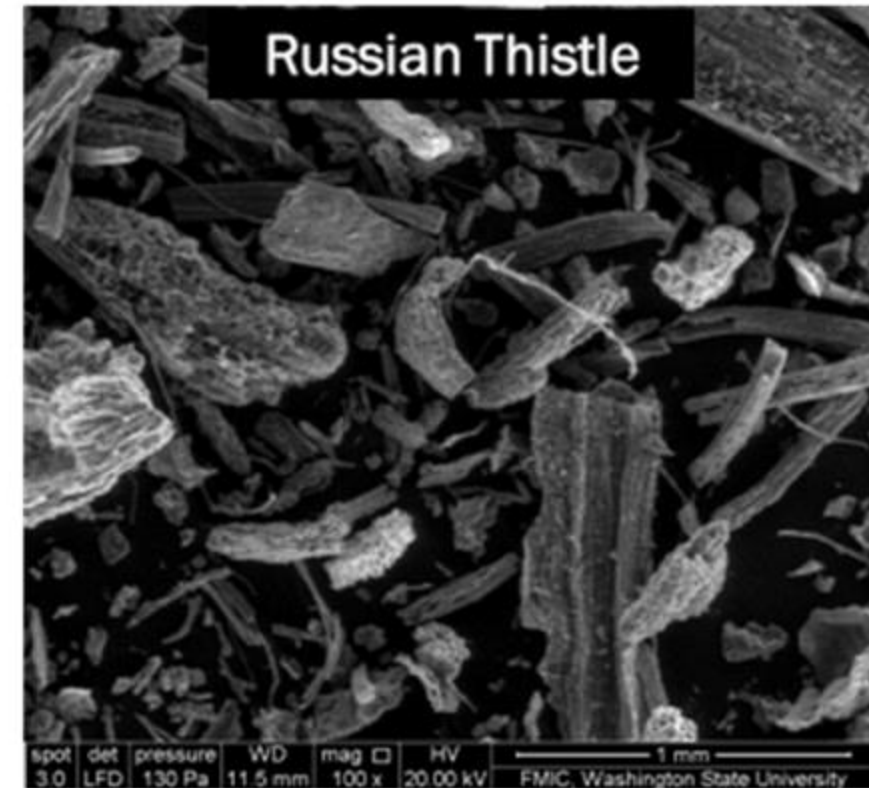



## A. Agronomic response of 'Oregon Spring' cultivar to different biochar amendments.

| 'Oregon Spring' | Biochar   | CT |     | RGS |     | RGT |     | RT  |     | TMP |     | W  |     |
|-----------------|-----------|----|-----|-----|-----|-----|-----|-----|-----|-----|-----|----|-----|
|                 |           | %  | 0.5 | 1   | 0.5 | 1   | 0.5 | 1   | 0.5 | 1   | 0.5 | 1  | 0.5 |
| Biomass         | Exp1      |    |     |     | *** |     | *   |     |     | *   |     |    |     |
|                 | Exp2      |    |     |     | *   | *   |     |     |     |     |     |    |     |
|                 | Consensus | N  |     |     | O   | N   | N   |     |     | N   |     |    |     |
| Fruit weight    | Exp1      |    |     | **  | **  | *   |     | *** | **  | **  | **  | *  | *** |
|                 | Exp2      |    | *** | **  |     | *** |     |     |     |     |     | ** |     |
|                 | Consensus |    | N   | O   | N   | O   |     | N   | N   | N   | N   | O  | N   |
| Yield per plant | Exp1      |    | *** |     | *** |     | *** |     | *   | *   | *   |    | *   |
|                 | Exp2      |    | *** | *** | *** |     |     | **  |     |     | *   | ** |     |
|                 | Consensus |    | Y   | N   | Y   |     | N   | N   | N   | N   | Y   | N  | N   |

## B. Impact of different biochars on 'Oregon Spring' fruit quality parameters.

| 'Oregon Spring' | Biochar   | CT  |     | RGS |     | RGT |     | RT  |     | TMP |     | W   |     |
|-----------------|-----------|-----|-----|-----|-----|-----|-----|-----|-----|-----|-----|-----|-----|
|                 |           | %   | 0.5 | 1   | 0.5 | 1   | 0.5 | 1   | 0.5 | 1   | 0.5 | 1   | 0.5 |
| °Brix           | Exp1      |     | **  |     |     |     | *   |     | *** |     | *   | *** |     |
|                 | Exp2      | *** | *** |     | *   | **  |     | **  | *** | *** |     |     |     |
|                 | Consensus | N   | Y   |     | N   | N   | N   |     | O   | N   | N   | N   |     |
| Glucose         | Exp1      |     |     | **  |     |     | **  |     |     | **  | *** | *** | **  |
|                 | Exp2      | *   | *** | *   |     | *   |     | *** | *** | *** | *** |     |     |
|                 | Consensus | N   | N   | Y   |     | N   | N   | N   | N   | O   | O   | N   | N   |
| Fructose        | Exp1      |     |     | *** |     | *** |     | *   |     |     | *** | *** |     |
|                 | Exp2      |     | *** | *** | *** |     | **  |     |     | *** | *** |     |     |
|                 | Consensus |     | N   | Y   | N   | N   | N   | N   | N   | N   | O   | N   |     |
| Citric acid     | Exp1      | **  |     | *** | *   |     |     | *** | *   | **  | *** |     | *** |
|                 | Exp2      |     |     |     |     |     |     | *** | *** |     | *** | **  | **  |
|                 | Consensus | N   |     | N   | N   |     |     | O   | O   | N   | O   | N   | Y   |
| Malic acid      | Exp1      |     | *** | *** | *   | *** | *** | *** | *** | **  | *** | *** | *** |
|                 | Exp2      | *** |     | *** | *** | *** | *** | *** | *** |     |     |     | **  |
|                 | Consensus | N   | N   | Y   | Y   | Y   | Y   | Y   | Y   | N   | N   | N   | Y   |

Key: CT - Cool Terra®, RGS - Ryegrass straw, RGT - Ryegrass tailings, RT - Russian thistle, TMP - Thermomechanical pulp, and W - Walnut. Green boxes indicate a significant enhancement and red boxes indicate a significant reduction in the trait. \* = p-value < 0.10, \*\* = p-value < 0.05, and \*\*\* = p-value < 0.01. Y – Yes, N – No, O - Opposite.

## A. Agronomic response of 'Heinz' cultivar to different biochar amendments.

| 'Heinz' metrics | Biochar % | CT  |     | RGS |     | RGT |    | RT  |     | TMP |     | W   |     |
|-----------------|-----------|-----|-----|-----|-----|-----|----|-----|-----|-----|-----|-----|-----|
|                 |           | 0.5 | 1   | 0.5 | 1   | 0.5 | 1  | 0.5 | 1   | 0.5 | 1   | 0.5 | 1   |
| Biomass         | Exp1      | *** | *** |     |     | **  |    | **  | *** | **  | *** | *** | *** |
|                 | Exp2      |     |     |     |     | **  |    |     |     | *   |     | *   |     |
|                 | Consensus | N   | N   |     |     | O   |    | N   | N   | O   | N   | O   | N   |
| Fruit weight    | Exp1      | *** | **  |     |     | *** | *  | **  | **  |     |     |     | **  |
|                 | Exp2      | *** |     | *** | *** |     | ** | **  | *** | *   |     |     | *** |
|                 | Consensus | Y   | N   | N   | N   | N   | Y  | Y   | Y   | N   |     |     | Y   |
| Yield per plant | Exp1      | *   | *** | *** |     | **  | ** |     | *** | *** | *** | *** | *   |
|                 | Exp2      |     |     |     | *** |     |    |     | **  |     | **  | *** | **  |
|                 | Consensus | N   | N   | N   | N   | N   | N  |     | O   | N   | O   | O   | O   |

## B. Impact of different biochars on 'Heinz' fruit quality.

| 'Heinz' metrics | Biochar % | CT  |     | RGS |     | RGT |     | RT  |     | TMP |     | W   |     |
|-----------------|-----------|-----|-----|-----|-----|-----|-----|-----|-----|-----|-----|-----|-----|
|                 |           | 0.5 | 1   | 0.5 | 1   | 0.5 | 1   | 0.5 | 1   | 0.5 | 1   | 0.5 | 1   |
| °Brix           | Exp1      | *** | *** | *** | *** | *** | *** | *** | *** |     | *** | *** | *** |
|                 | Exp2      | **  | *** | **  |     | *   |     |     |     |     |     |     |     |
|                 | Consensus | Y   | Y   | Y   | N   | Y   | N   | N   | N   |     | N   | N   | N   |
| Glucose         | Exp1      |     | *** | **  | *** |     | *** |     | *** | *** | **  | **  |     |
|                 | Exp2      | **  | **  |     | **  | *** |     | *** |     | *** | **  | *** | **  |
|                 | Consensus | N   | Y   | N   | O   | N   | N   | N   | N   | Y   | O   | O   | N   |
| Fructose        | Exp1      |     | *** | **  | *** |     | *** |     | *** | *** | *   | **  |     |
|                 | Exp2      |     | *** |     |     | *** |     | *** | **  | *** | *** | *** | *** |
|                 | Consensus |     | Y   | N   | N   | N   | N   | N   | O   | Y   | O   | O   | N   |
| Citric acid     | Exp1      | **  | *** | *** | **  |     | *** |     | *** |     |     |     |     |
|                 | Exp2      | *** |     | **  | *** | **  |     | **  | **  | *** | **  |     | *** |
|                 | Consensus | O   | N   | O   | O   | N   | N   | N   | O   | N   | O   |     | N   |
| Malic acid      | Exp1      | **  | *** | *** | *** |     | *** |     | **  | **  |     | *   |     |
|                 | Exp2      | *   | *** |     | *** | *** |     | *** | *** | *** | **  | *** | *** |
|                 | Consensus | O   | Y   | N   | O   | N   | N   | N   | O   | Y   | N   | O   | N   |

Key: CT - Cool Terra®, RGS - Ryegrass straw, RGT - Ryegrass tailings, RT - Russian thistle, TMP - Thermomechanical pulp, and W - Walnut. Green boxes indicate a significant enhancement and red boxes indicate a significant reduction in the trait. \* = p-value <0.10, \*\* = p-value <0.05, and \*\*\* = p-value <0.01. Y – Yes, N – No, O - Opposite..

## A. Agronomic response of 'Cobra' cultivar to different biochar amendments.

bioRxiv preprint doi: <https://doi.org/10.1101/2020.06.28.176487>; this version posted June 29, 2020. The copyright holder for this preprint (which was not certified by peer review) is the author/funder, who has granted bioRxiv a license to display the preprint in perpetuity. It is made available under aCC-BY 4.0 International license.

| 'Cobra' metrics | Biochar % | CT  |     | RGS |     | RGT |     | RT  |     | TMP |    | W   |    |
|-----------------|-----------|-----|-----|-----|-----|-----|-----|-----|-----|-----|----|-----|----|
|                 |           | 0.5 | 1   | 0.5 | 1   | 0.5 | 1   | 0.5 | 1   | 0.5 | 1  | 0.5 | 1  |
| Biomass         | Exp 1     |     | **  |     | *** |     | **  | *** |     |     | ** |     |    |
|                 | Exp 2     |     |     | **  |     | *   |     | *** |     |     |    |     |    |
|                 | Consensus |     | N   | O   | N   |     | O   | N   |     | N   | N  |     |    |
| Fruit Weight    | Exp 1     |     |     |     |     |     |     |     |     | *** |    |     | ** |
|                 | Exp 2     |     |     | **  |     | *   | *** |     | *** | *** | ** | **  |    |
|                 | Consensus |     |     | N   |     | N   | N   |     | N   | O   | N  | N   | N  |
| YPP             | Exp 1     | **  | *** | *** | *** | **  | *** |     | *** |     |    | **  | ** |
|                 | Exp 2     |     |     | *** |     | *** | **  |     | *** |     |    |     | ** |
|                 | Consensus | N   | N   | Y   | N   | Y   | Y   |     | Y   |     |    | N   | Y  |

## B. Impact of different biochars on 'Cobra' fruit quality.

| 'Cobra' metrics | Biochar % | CT  |     | RGS |     | RGT |     | RT  |     | TMP |     | W   |     |
|-----------------|-----------|-----|-----|-----|-----|-----|-----|-----|-----|-----|-----|-----|-----|
|                 |           | 0.5 | 1   | 0.5 | 1   | 0.5 | 1   | 0.5 | 1   | 0.5 | 1   | 0.5 | 1   |
| °Brix           | Exp1      |     | *** | *   |     | *** | *** |     | *** | *   | *** | **  | **  |
|                 | Exp2      | *** |     | **  |     | **  | **  | **  |     | *   |     | *   |     |
|                 | Consensus | N   | N   | O   |     | Y   | Y   | N   | N   | Y   | N   | O   | N   |
| Glucose         | Exp1      | **  |     |     | *   | *** | *** |     |     |     | *** | *** | *** |
|                 | Exp2      |     |     | *** | *** | *** |     |     |     | **  | *** | *** | **  |
|                 | Consensus | N   |     | N   | O   | O   | N   |     |     | N   | O   | O   | O   |
| Fructose        | Exp1      | *** | *** |     | **  | *** | *** |     | **  | *** | *** | *** | *** |
|                 | Exp2      | *** | *** |     | **  |     |     | **  | *** | **  |     | *** |     |
|                 | Consensus | Y   | Y   |     | Y   | N   | N   | N   | Y   | O   | N   | O   | N   |
| Citric acid     | Exp1      | *** | **  |     |     | *** | *** | *** | *** | **  | *** | *** | *** |
|                 | Exp2      |     |     | **  | *   | *** | **  |     |     | *   |     |     | **  |
|                 | Consensus | N   | N   | N   | N   | O   | O   | N   | N   | O   | N   | N   | O   |
| Malic acid      | Exp1      |     | *   |     |     |     | **  |     | *   | **  | *** | *** | *** |
|                 | Exp2      | **  |     | **  | *   | *** | *** |     |     | *** | **  | *** | *** |
|                 | Consensus | N   | N   | N   | N   | N   | O   |     | N   | O   | O   | O   | O   |

Key: CT - Cool Terra®, RGS - Ryegrass straw, RGT - Ryegrass tailings, RT - Russian thistle, TMP - Thermomechanical pulp, and W - Walnut. Green boxes indicate a significant enhancement and red boxes indicate a significant reduction in the trait. \* = p-value < 0.10, \*\* = p-value < 0.05, and \*\*\* = p-value < 0.01. Y – Yes, N – No, O - Opposite.



Table 2. Qualitative elemental composition of different biochars using EDX spectral analysis.

Boxes with Y indicate the presence of elements, while blank boxes denote that the element was either not detected or below the detection threshold.

| <b>Biochar</b>                     | <b>N</b> | <b>P</b> | <b>K</b> | <b>Ca</b> | <b>S</b> | <b>Mg</b> | <b>Mo</b> | <b>Si</b> | <b>Cl</b> | <b>Na</b> | <b>Al</b> |
|------------------------------------|----------|----------|----------|-----------|----------|-----------|-----------|-----------|-----------|-----------|-----------|
| <b>Feedstock</b>                   |          |          |          |           |          |           |           |           |           |           |           |
| Ryegrass tailings (RGT)            | Y        | Y        | Y        | Y         | Y        | Y         | Y         | Y         |           |           | Y         |
| Ryegrass straw (RGS)               | Y        | Y        | Y        | Y         | Y        |           |           | Y         | Y         |           |           |
| Thermo-mechanical pulp waste (TMP) | Y        | Y        | Y        | Y         |          |           |           | Y         |           |           |           |
| Walnut (W)                         | Y        | Y        |          | Y         |          |           |           |           |           |           | Y         |
| Russian thistle (RT)               | Y        | Y        | Y        | Y         | Y        |           | Y         | Y         | Y         |           |           |
| Cool Terra® (CT)                   | Y        |          | Y        |           |          |           |           | Y         |           | Y         | Y         |
